# Supplementary material for: Structures and characteristics of atomically thin ZrO2from monolayer to bilayer and two-dimensional ZrO2–MoS2heterojunction
Source: Royal Society of Chemistry journal article supplement (doi:10.1039/c9ra06074j), 2019-01-01
Supplement: c9ra06074j1.pdf [file c9ra06074j1.pdf]

## Electronic Supplementary Information

### **Structures and characteristics of atomically thin ZrO<sub>2</sub> from monolayer to bilayer and two-dimensional ZrO<sub>2</sub>-MoS<sub>2</sub> heterojunction**

Junhui Weng and Shang-Peng Gao\*

Department of Materials Science, Fudan University, Shanghai 200433, P. R. China. E-mail:

gaosp@fudan.edu.cn

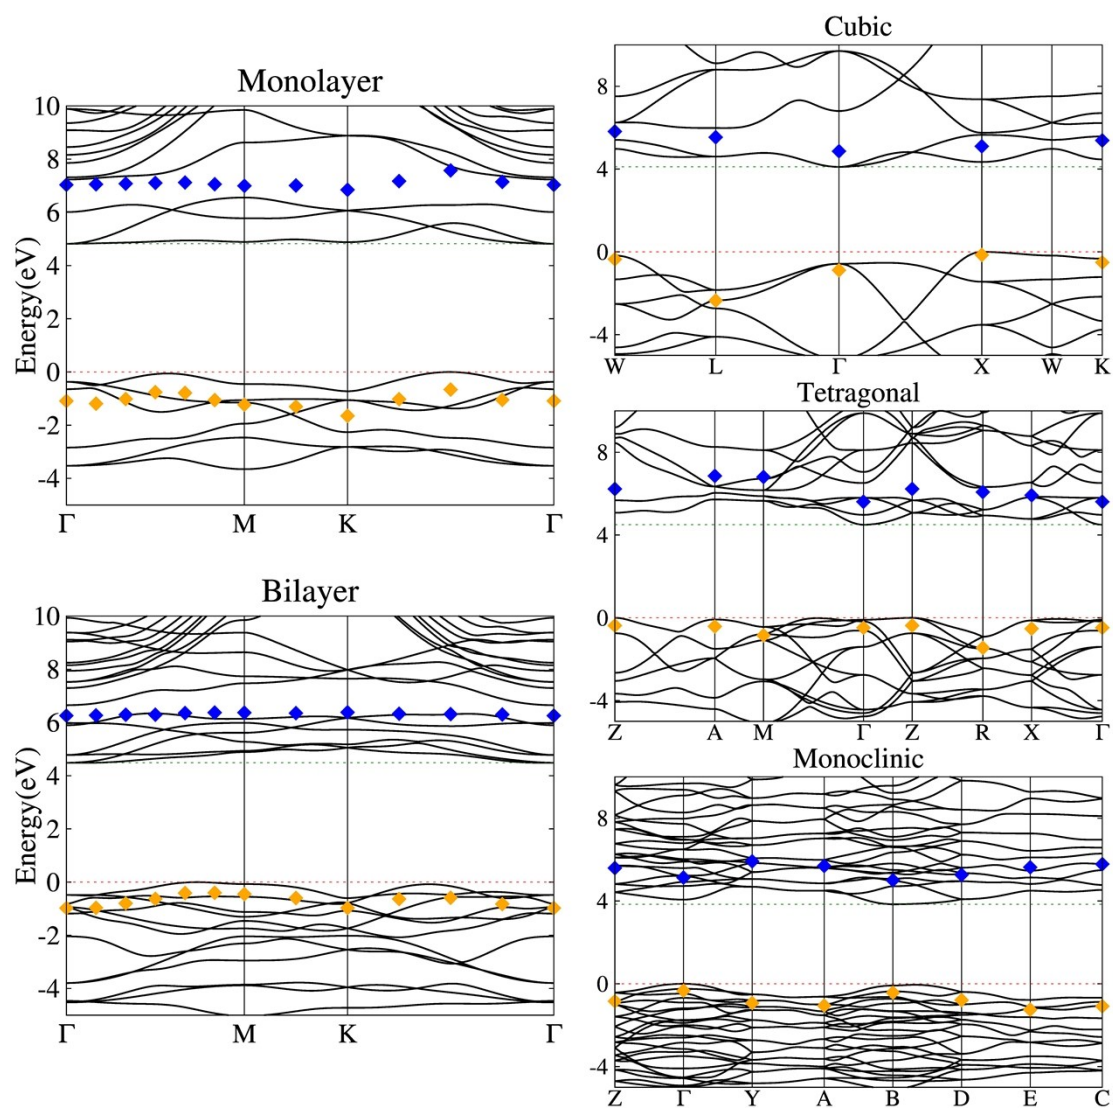

Figure S1 Electronic band structures calculated by DFT-GGA using ABINIT code for 2D and bulk  $\text{ZrO}_2$  polymorphs: (a) monolayer  $\text{ZrO}_2$ , (b) bilayer  $\text{ZrO}_2$ , (c) cubic  $\text{ZrO}_2$ , (d) tetragonal  $\text{ZrO}_2$ , and (e) monoclinic  $\text{ZrO}_2$ . Yellow points and blue points indicate the values of highest valence band energies and lowest conduction band energies obtained with the GW method, respectively. The valence band maximum from the DFT-GGA calculation is set to 0 eV.

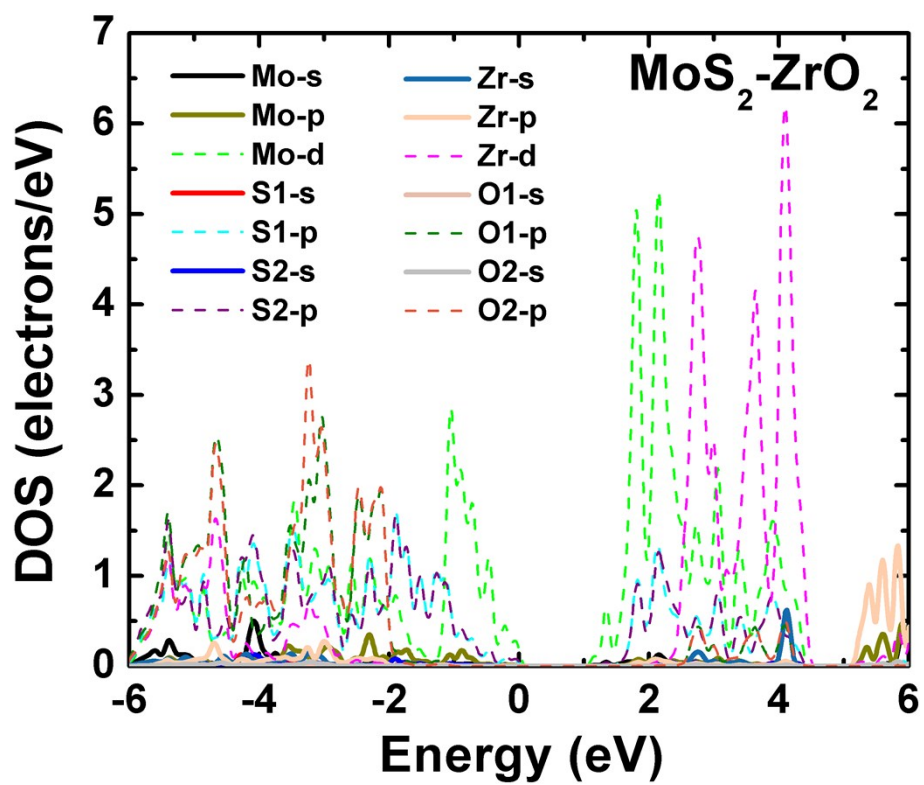

Figure S2 The calculated PDOS of 2D ZrO<sub>2</sub>-MoS<sub>2</sub> heterojunction. The dotted lines indicate the PDOSs which are more significant and have been shown in the main text, and the solid lines shows the less significant PDOSs for completeness and comparison.
